# Supplementary material for: Real-World Outcomes in First-Line Treatment of Metastatic Castration-Resistant Prostate Cancer: The Prostate Cancer Registry
Source: Springer Nature journal article supplement (doi:10.1007/s11523-020-00720-2), 2020-06-01
Supplement: MOESM3 [file 18050800]

## **Real-World Outcomes in First-Line Treatment of Metastatic Castration-Resistant Prostate Cancer: the Prostate Cancer Registry**

Simon Chowdhury<sup>1\*</sup> • Anders Bjartell<sup>2</sup> • Nicolaas Lumen<sup>3</sup> • Pablo Maroto<sup>4</sup> • Thomas Paiss<sup>5</sup> • Francisco Gomez-Veiga<sup>6</sup> • Alison Birtle<sup>7</sup> • Gero Kramer<sup>8</sup> • Ewa Kalinka<sup>9</sup> • Dominique Spaëth<sup>10</sup> • Susan Feyerabend<sup>11</sup> • Vsevolod Matveev<sup>12</sup> • Florence Lefresne<sup>13</sup> • Martin Lukac<sup>14</sup> • Robert Wapenaar<sup>15</sup> • Luis Costa<sup>16</sup>

<sup>1</sup>Guy's and St Thomas' NHS Foundation Trust and Sarah Cannon Research Institute, London, UK

<sup>2</sup>Department of Urology, Skåne University Hospital Malmö, Lund University Sweden

<sup>3</sup>Ghent University Hospital, Dept. of Urology, C. Heymanslaan 10, 9000 Ghent, Belgium

<sup>4</sup>Department of Medical Oncology, Hospital de la Santa Creu i Sant Pau, Autonomous University of Barcelona, 08025 Barcelona, Spain

<sup>5</sup>Urologie team Ulm, Ulm, Germany

<sup>6</sup>Urology Department and Kidney Transplant Unit, Translational Research Group of Urology GITUR-IBSAL, Salamanca University Hospital, Salamanca, Spain

<sup>7</sup>Royal Preston Hospital, Preston, UK

<sup>8</sup>Department of Urology, Medical University of Vienna, Vienna, Austria

<sup>9</sup>Clinic of Oncology, Polish Mother's Memorial Hospital – Research Institute, Lodz, Poland

<sup>10</sup>Centre d'Oncologie de Gentilly, Nancy, France

<sup>11</sup>Studienpraxis Urologie, Nürtingen, Germany

<sup>12</sup>N.N. Blokhin National Cancer Research Center, Moscow, Russia

<sup>13</sup>EMEA Oncology, Janssen Pharmaceutica N.V., Beerse, Belgium

<sup>14</sup>Parexel International Czech Republic s.r.o, on behalf of Janssen Pharmaceutica N.V., Beerse, Belgium

<sup>15</sup>Janssen-Cilag B.V., Breda, The Netherlands

<sup>16</sup>Oncology Division, Hospital de Santa Maria, Instituto de Medicina Molecular, Faculdade de Medicina, Universidade de Lisboa, 1649-035 Lisbon, Portugal

**Fig. S1** Data collection schedule

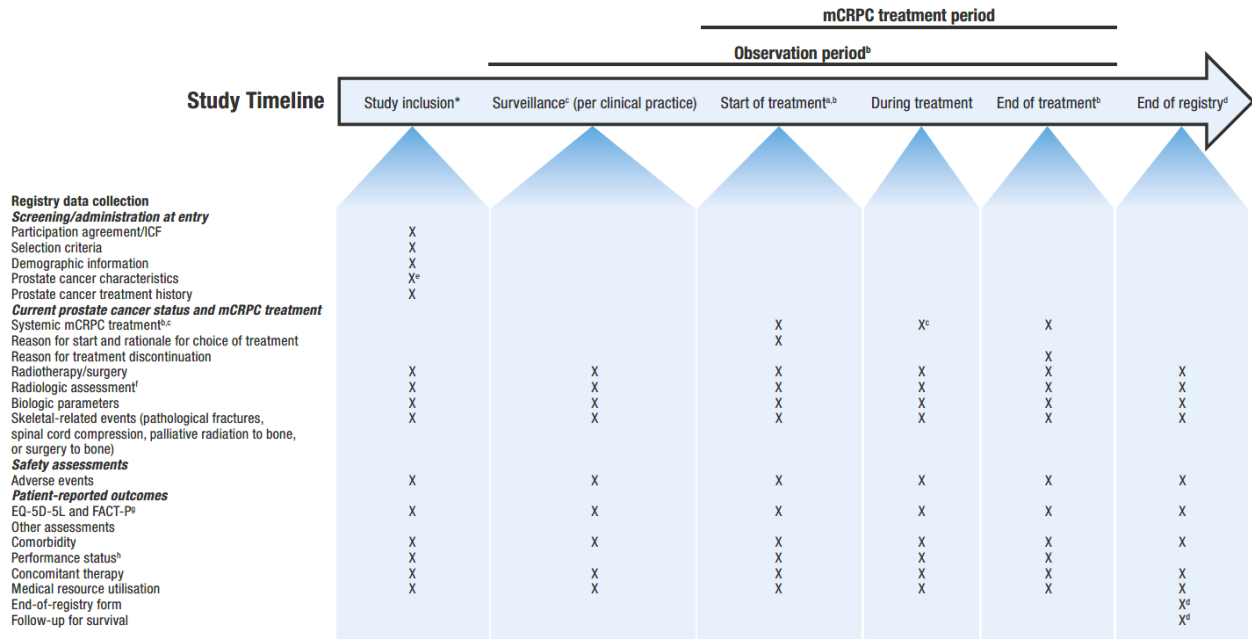

Note: Patients could enter multiple systemic mCRPC treatment periods and periods of surveillance during the Registry

<sup>a</sup>For patients entering the Registry, the data from the baseline data collection and start of data collection may be the same; at enrollment, initiation of a new systemic mCRPC treatment was considered at  $\pm 30$  days from a patient's baseline data collection

<sup>b</sup>Data were collected at the points of initiation and termination of each new systemic mCRPC treatment during the observational period. Recorded information included the type of treatment, start and stop dates, dose, and frequency of administration. The maximum duration of follow-up for individual patients in the observational period of the Registry was 3 years, regardless of when they enrolled

<sup>c</sup>For patients undergoing long-term (>3 months) systemic mCRPC treatment or in surveillance, data were collected at suggested intervals of 3 months

<sup>d</sup>The end of Registry was the last data collection time point for an individual patient, a maximum of 3 years after their enrollment. The close of Registry will be approximately 5.5 years after the first patient was enrolled. Survival data will be collected for all patients 3 years after their enrollment or at the close of the Registry, whichever occurs first, except for those patients who withdraw their consent prior to completing the Registry

<sup>e</sup>Including dates of initial diagnosis, first metastatic diagnosis and castration resistance, TNM stage and Gleason score at diagnosis, and most recent Gleason score

<sup>f</sup>Prostate Cancer Working Group 2 and Response Evaluation Criteria In Solid Tumors are recommended guidelines for radiologic assessment

<sup>g</sup>Where permitted per local regulations

<sup>h</sup>Performance status was collected using the ECOG scale

*ECOG* Eastern Cooperative Oncology Group, *EQ-5D-5L* European Quality of Life-5 Dimensions, 5 Levels, *FACT-P* Functional Assessment of Cancer Therapy-Prostate, *ICF* International Classification of Functioning, Disability and Health, *mCRPC* metastatic castration-resistant prostate cancer, *TNM* tumor, node, metastasis

**Fig. S2** Study flow

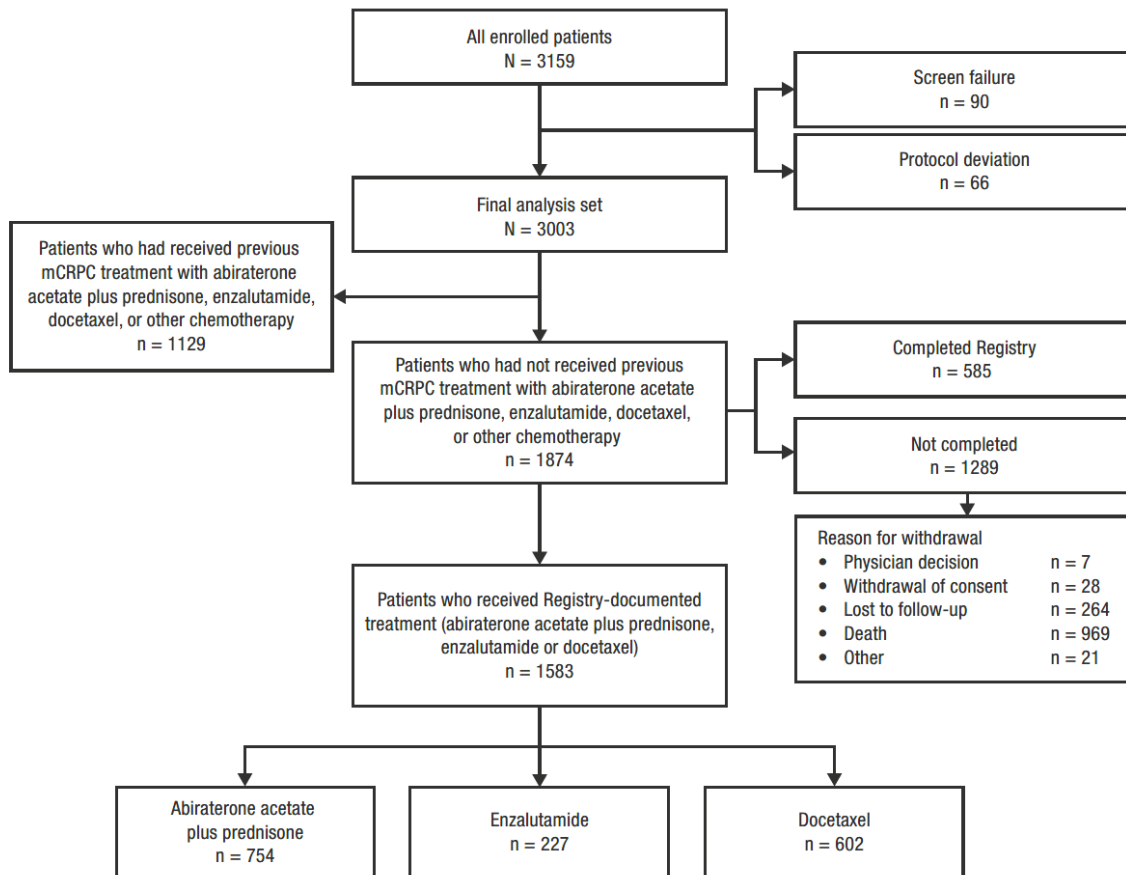

*mCRPC* metastatic castration-resistant prostate cancer

**Supplementary Table S1.** Duration of treatment in the first-line treatment population, including subgroups

| Kaplan-Meier estimates (ongoing treatment is censored at the data cut) | Abiraterone     | Enzalutamide     | Docetaxel <sup>a</sup> |
|------------------------------------------------------------------------|-----------------|------------------|------------------------|
| First-line population                                                  |                 |                  |                        |
| <i>N</i>                                                               | 754             | 227              | 602                    |
| Median (95% CI) duration of treatment, months                          | 11.2 (9.8–12.2) | 13.0 (10.4–15.9) | 4.8 (4.4–5.0)          |
| Patients with cardiovascular disease                                   |                 |                  |                        |
| <i>N</i>                                                               | 504             | 161              | 351                    |
| Median (95% CI) duration of treatment, months                          | 11.1 (9.5–12.7) | 12.7 (9.1–15.3)  | 4.6 (4.3–5.0)          |
| Patients with diabetes mellitus                                        |                 |                  |                        |
| <i>N</i>                                                               | 121             | 47               | 100                    |
| Median (95% CI) duration of treatment, months                          | 11.5 (9.1–16.1) | 12.2 (8.2–17.5)  | 4.3 (3.6–4.9)          |
| Patients with visceral metastases                                      |                 |                  |                        |
| <i>N</i>                                                               | 59              | –                | 88                     |
| Median (95% CI) duration of treatment, months                          | 7.9 (5.5–10.9)  | –                | 4.3 (3.5–5.1)          |

<sup>a</sup>Docetaxel treatment was restricted to a limited number of cycles; therefore, duration of treatment in the docetaxel group cannot be compared with that in the abiraterone or enzalutamide treatment groups

*CI* confidence interval, *N* number of evaluable patients for each specific parameter

**Supplementary Table S2.** Reason for stopping systemic mCRPC treatment in the first-line treatment population, including subgroups

|                                                            | Abiraterone | Enzalutamide | Docetaxel <sup>a</sup> |
|------------------------------------------------------------|-------------|--------------|------------------------|
| All patients                                               | 754         | 227          | 602                    |
| Reason for stopping systemic mCRPC treatment, <i>n</i> (%) |             |              |                        |
| <i>N</i>                                                   | 607         | 171          | 586                    |
| Completed therapy                                          | 11 (1.8)    | 5 (2.9)      | 293 (50.0)             |
| Toxicity                                                   | 43 (7.1)    | 23 (13.5)    | 83 (14.2)              |
| Disease progression                                        | 442 (72.8)  | 115 (67.3)   | 158 (27.0)             |
| Death                                                      | 44 (7.2)    | 19 (11.1)    | 22 (3.8)               |
| Other                                                      | 67 (11.0)   | 9 (5.3)      | 30 (5.1)               |
| Patients with cardiovascular disease                       |             |              |                        |
| All                                                        | 504         | 161          | 351                    |
| Reason for stopping systemic mCRPC treatment, <i>n</i> (%) |             |              |                        |
| <i>N</i>                                                   | 403         | 126          | 342                    |
| Completed therapy                                          | 7 (1.7)     | 3 (2.4)      | 169 (49.4)             |
| Toxicity                                                   | 36 (8.9)    | 21 (16.7)    | 50 (14.6)              |
| Disease progression                                        | 290 (72.0)  | 79 (62.7)    | 83 (24.3)              |
| Death                                                      | 28 (6.9)    | 15 (11.9)    | 19 (5.6)               |
| Other                                                      | 42 (10.4)   | 8 (6.3)      | 21 (6.1)               |
| Patients with diabetes mellitus                            |             |              |                        |
| All                                                        | 121         | 47           | 100                    |
| Reason for stopping systemic mCRPC treatment, <i>n</i> (%) |             |              |                        |
| <i>N</i>                                                   | 92          | 38           | 100                    |
| Completed therapy                                          | 2 (2.2)     | 2 (5.3)      | 44 (44.0)              |
| Toxicity                                                   | 11 (12.0)   | 5 (13.2)     | 19 (19.0)              |
| Disease progression                                        | 61 (66.3)   | 22 (57.9)    | 24 (24.0)              |
| Death                                                      | 9 (9.8)     | 7 (18.4)     | 5 (5.0)                |
| Other                                                      | 9 (9.8)     | 2 (5.3)      | 8 (8.0)                |
| Patients with visceral metastases                          |             |              |                        |

|                                                               |           |   |           |
|---------------------------------------------------------------|-----------|---|-----------|
| All                                                           | 59        | – | 88        |
| Reason for stopping systemic mCRPC treatment, <i>n</i><br>(%) |           |   |           |
| <i>N</i>                                                      | 48        | – | 86        |
| Completed therapy                                             | 1 (2.1)   | – | 42 (48.8) |
| Toxicity                                                      | 5 (10.4)  | – | 10 (11.6) |
| Disease progression                                           | 34 (70.8) | – | 23 (26.7) |
| Death                                                         | 5 (10.4)  | – | 4 (4.7)   |
| Other                                                         | 3 (6.3)   | – | 7 (8.1)   |

---

<sup>a</sup>Docetaxel treatment was restricted to a limited number of cycles; therefore, the reasons for stopping treatment in the docetaxel group cannot be compared with that in the abiraterone or enzalutamide treatment groups

*mCRPC* metastatic castration-resistant prostate cancer; *N* number of evaluable patients for each specific parameter

**Table S3A.** Patient demographics and disease and biological characteristics at study inclusion in patients with cardiovascular disease in the first-line treatment population

| Characteristic                                                           | Abiraterone<br><i>N</i> = 504 | Enzalutamide<br><i>N</i> = 161 | Docetaxel<br><i>N</i> = 351 |
|--------------------------------------------------------------------------|-------------------------------|--------------------------------|-----------------------------|
| <b>Age</b>                                                               |                               |                                |                             |
| Mean (SD), years                                                         | 76.5 (7.46)                   | 76.4 (7.28)                    | 70.7 (7.41)                 |
| Median (range), years                                                    | 77.0 (50–94)                  | 77.0 (59–91)                   | 71.0 (47–88)                |
| <b>Age group, n (%)</b>                                                  |                               |                                |                             |
| <65 years                                                                | 35 (6.9)                      | 10 (6.2)                       | 73 (20.8)                   |
| 65–74 years                                                              | 133 (26.4)                    | 52 (32.3)                      | 162 (46.2)                  |
| ≥75 years                                                                | 336 (66.7)                    | 99 (61.5)                      | 116 (33.0)                  |
| <b>ECOG performance status, n (%)</b>                                    |                               |                                |                             |
| <i>N</i>                                                                 | 477                           | 130                            | 314                         |
| 0                                                                        | 218 (45.7)                    | 62 (47.7)                      | 110 (35.0)                  |
| 1                                                                        | 214 (44.9)                    | 51 (39.2)                      | 171 (54.5)                  |
| ≥2                                                                       | 45 (9.4)                      | 17 (13.1)                      | 33 (10.5)                   |
| <b>Gleason score at initial diagnosis, n (%)</b>                         |                               |                                |                             |
| <i>N</i>                                                                 | 448                           | 144                            | 332                         |
| ≤6                                                                       | 71 (15.8)                     | 20 (13.9)                      | 41 (12.3)                   |
| 7                                                                        | 154 (34.4)                    | 39 (27.1)                      | 103 (31.0)                  |
| 8–10                                                                     | 223 (49.8)                    | 85 (59.0)                      | 188 (56.6)                  |
| <b>M stage at initial diagnosis, n (%)</b>                               |                               |                                |                             |
| <i>N</i>                                                                 | 488                           | 156                            | 341                         |
| Mx                                                                       | 114 (23.4)                    | 27 (17.3)                      | 48 (14.1)                   |
| M0                                                                       | 217 (44.5)                    | 67 (42.9)                      | 127 (37.2)                  |
| M1, M1a, M1b, M1c                                                        | 157 (32.2)                    | 62 (39.7)                      | 166 (48.7)                  |
| <b>Time from initial prostate cancer diagnosis to start of the study</b> |                               |                                |                             |



|                                          |                  |                 |                  |
|------------------------------------------|------------------|-----------------|------------------|
| <i>N</i>                                 | 504              | 161             | 351              |
| Median years (range)                     | 5.3 (0–29)       | 4.9 (0–21)      | 3.1 (0–22)       |
| Presence of bone metastases, n (%)       |                  |                 |                  |
| <i>N</i>                                 | 374              | 131             | 269              |
| Any                                      | 328 (87.7)       | 118 (90.1)      | 238 (88.5)       |
| ≥5                                       | 134 (35.8)       | 46 (35.1)       | 113 (42.0)       |
| Visceral metastases, n (%)               |                  |                 |                  |
| <i>N</i>                                 | 402              | 113             | 301              |
| Liver only                               | 7 (1.7)          | 6 (5.3)         | 27 (9.0)         |
| Lung only                                | 25 (6.2)         | 4 (3.5)         | 21 (7.0)         |
| Liver and lung                           | 5 (1.2)          | 0               | 5 (1.7)          |
| Biological parameters                    |                  |                 |                  |
| PSA, ng/mL                               |                  |                 |                  |
| <i>N</i>                                 | 493              | 160             | 341              |
| Mean (SD)                                | 129.78 (559.819) | 86.76 (188.571) | 162.66 (541.211) |
| Lactic acid dehydrogenase, U/L           |                  |                 |                  |
| <i>N</i>                                 | 227              | 60              | 148              |
| Mean (SD)                                | 324.3 (290.17)   | 265.3 (158.48)  | 371.3 (352.14)   |
| Hemoglobin, g/dL                         |                  |                 |                  |
| <i>N</i>                                 | 438              | 143             | 319              |
| Mean (SD)                                | 12.6 (1.61)      | 12.8 (1.38)     | 12.5 (1.72)      |
| Alkaline phosphatase, U/L                |                  |                 |                  |
| <i>N</i>                                 | 392              | 137             | 252              |
| Mean (SD)                                | 197.8 (286.62)   | 148.9 (249.46)  | 213.4 (283.95)   |
| Comorbidities requiring treatment, n (%) |                  |                 |                  |
| Any                                      | 504              | 161             | 351              |
| Cardiovascular                           | 504 (100.0)      | 161 (100.0)     | 351 (100.0)      |
| Hypertension                             | 411 (81.5)       | 129 (80.1)      | 289 (82.3)       |

|                                       |            |           |           |
|---------------------------------------|------------|-----------|-----------|
| Angina pectoris                       | 34 (6.7)   | 12 (7.5)  | 35 (10.0) |
| Myocardial infarction                 | 48 (9.5)   | 21 (13.0) | 32 (9.1)  |
| Arrhythmia                            | 62 (12.3)  | 22 (13.7) | 41 (11.7) |
| Thromboembolic disease                | 21 (4.2)   | 8 (5.0)   | 18 (5.1)  |
| Cerebrovascular accident              | 19 (3.8)   | 3 (1.9)   | 17 (4.8)  |
| Transient ischemic attack             | 14 (2.8)   | 5 (3.1)   | 9 (2.6)   |
| Other cardiovascular                  | 139 (27.6) | 39 (24.2) | 80 (22.8) |
| Respiratory                           | 46 (9.1)   | 23 (14.3) | 38 (10.8) |
| Chronic obstructive pulmonary disease | 31 (6.2)   | 16 (9.9)  | 22 (6.3)  |
| Other respiratory                     | 16 (3.2)   | 8 (5.0)   | 16 (4.6)  |
| Renal                                 | 43 (8.5)   | 20 (12.4) | 32 (9.1)  |
| Chronic renal disease                 | 27 (5.4)   | 14 (8.7)  | 16 (4.6)  |
| Other renal                           | 16 (3.2)   | 6 (3.7)   | 16 (4.6)  |
| Hepatic                               | 15 (3.0)   | 3 (1.9)   | 6 (1.7)   |
| Chronic hepatic disease               | 8 (1.6)    | 3 (1.9)   | 3 (0.9)   |
| Other hepatic                         | 7 (1.4)    | 0         | 3 (0.9)   |
| Neurologic                            | 52 (10.3)  | 17 (10.6) | 37 (10.5) |
| Peripheral sensory impairment         | 1 (0.2)    | 0         | 5 (1.4)   |
| Memory impairment                     | 3 (0.6)    | 4 (2.5)   | 2 (0.6)   |
| Cognitive disorder                    | 3 (0.6)    | 2 (1.2)   | 0         |
| Convulsion                            | 3 (0.6)    | 0         | 0         |
| Other neurologic                      | 15 (3.0)   | 4 (2.5)   | 7 (2.0)   |
| Infections                            | 5 (1.0)    | 3 (1.9)   | 1 (0.3)   |
| Other infection                       | 5 (1.0)    | 3 (1.9)   | 1 (0.3)   |
| Diabetes mellitus                     | 101 (20.0) | 36 (22.4) | 84 (23.9) |
| Type 2                                | 75 (14.9)  | 28 (17.4) | 72 (20.5) |
| Type 1                                | 26 (5.2)   | 8 (5.0)   | 12 (3.4)  |
| Investigations                        |            |           |           |

|                      |            |           |           |
|----------------------|------------|-----------|-----------|
| Hypercholesterolemia | 110 (21.8) | 48 (29.8) | 53 (15.1) |
|----------------------|------------|-----------|-----------|

---

*ECOG* Eastern Cooperative Oncology Group, *M* metastatic status, *N* number of evaluable patients for each specific parameter, *PSA* prostate-specific antigen, *SD* standard deviation

**Table 3B.** Treatment history at study inclusion in patients with cardiovascular disease in the first-line treatment population

| Prior treatment, <i>n</i> (%)                                                | Abiraterone<br><i>N</i> = 504 | Enzalutamide<br><i>N</i> = 161 | Docetaxel<br><i>N</i> = 351 |
|------------------------------------------------------------------------------|-------------------------------|--------------------------------|-----------------------------|
| Orchiectomy since initial diagnosis                                          | 27 (5.4)                      | 8 (5.0)                        | 21 (6.0)                    |
| Radical prostatectomy/prostate-specific radiotherapy since initial diagnosis |                               |                                |                             |
| Both radical prostatectomy and prostate-specific radiotherapy                | 48 (9.5)                      | 12 (7.5)                       | 33 (9.4)                    |
| Radical prostatectomy only                                                   | 59 (11.7)                     | 18 (11.2)                      | 33 (9.4)                    |
| Prostate-specific radiotherapy only                                          | 123 (24.4)                    | 32 (19.9)                      | 81 (23.1)                   |
| None                                                                         | 274 (54.4)                    | 99 (61.5)                      | 204 (58.1)                  |
| Prior systemic anticancer therapy                                            |                               |                                |                             |
| Any                                                                          | 483 (95.8)                    | 152 (94.4)                     | 330 (94.0)                  |
| Endocrine therapy                                                            | 479 (95.0)                    | 150 (93.2)                     | 327 (93.2)                  |
| Antiandrogen                                                                 | 432 (85.7)                    | 134 (83.2)                     | 300 (85.5)                  |
| GnRH agonist                                                                 | 314 (62.3)                    | 109 (67.7)                     | 259 (73.8)                  |
| Steroids                                                                     | 51 (10.1)                     | 15 (9.3)                       | 44 (12.5)                   |
| GnRH antagonist                                                              | 43 (8.5)                      | 4 (2.5)                        | 20 (5.7)                    |
| Estrogens and derivatives                                                    | 18 (3.6)                      | 5 (3.1)                        | 4 (1.1)                     |
| Adrenal synthesis inhibitors                                                 | 6 (1.2)                       | 0 (0)                          | 7 (2.0)                     |
| Other                                                                        | 0 (0)                         | 3 (1.9)                        | 2 (0.6)                     |
| Bone-targeted                                                                |                               |                                |                             |
| Any                                                                          | 104 (20.6)                    | 26 (16.1)                      | 88 (25.1)                   |
| Zoledronic acid                                                              | 76 (15.1)                     | 14 (8.7)                       | 60 (17.1)                   |
| Denosumab                                                                    | 29 (5.8)                      | 9 (5.6)                        | 20 (5.7)                    |
| Other                                                                        | 8 (1.6)                       | 6 (3.7)                        | 15 (4.3)                    |

Other

8 (1.6)

5 (3.1)

6 (1.7)

---

*GnRH* gonadotropin-releasing hormone

**Table S4A.** Patient demographics and disease and biological characteristics at study inclusion in patients with diabetes mellitus in the first-line treatment population

| Characteristic                                          | Abiraterone<br><i>N</i> = 121 | Enzalutamide<br><i>N</i> = 47 | Docetaxel<br><i>N</i> = 100 |
|---------------------------------------------------------|-------------------------------|-------------------------------|-----------------------------|
| <b>Age</b>                                              |                               |                               |                             |
| Mean (SD) years                                         | 76.2 (7.20)                   | 76.7 (7.04)                   | 69.2 (6.96)                 |
| Median (range), years                                   | 77.0 (54–93)                  | 77.0 (62–91)                  | 69.0 (51–88)                |
| <b>Age group, years, <i>n</i> (%)</b>                   |                               |                               |                             |
| <65 years                                               | 7 (5.8)                       | 3 (6.4)                       | 26 (26.0)                   |
| 65–74 years                                             | 37 (30.6)                     | 14 (29.8)                     | 50 (50.0)                   |
| ≥75 years                                               | 77 (63.6)                     | 30 (63.8)                     | 24 (24.0)                   |
| <b>ECOG performance status, <i>n</i> (%)</b>            |                               |                               |                             |
| <i>N</i>                                                | 116                           | 38                            | 92                          |
| 0                                                       | 48 (41.4)                     | 19 (50.0)                     | 25 (27.2)                   |
| 1                                                       | 48 (41.4)                     | 14 (36.8)                     | 55 (59.8)                   |
| ≥2                                                      | 20 (17.2)                     | 5 (13.2)                      | 12 (13.0)                   |
| <b>Gleason score at initial diagnosis, <i>n</i> (%)</b> |                               |                               |                             |
| <i>N</i>                                                | 109                           | 43                            | 96                          |
| ≤6                                                      | 13 (11.9)                     | 7 (16.3)                      | 15 (15.6)                   |
| 7                                                       | 44 (40.4)                     | 12 (27.9)                     | 34 (35.4)                   |
| 8–10                                                    | 52 (47.7)                     | 24 (55.8)                     | 47 (49.0)                   |
| <b>M stage at initial diagnosis, <i>n</i> (%)</b>       |                               |                               |                             |
| <i>N</i>                                                | 118                           | 46                            | 97                          |
| Mx                                                      | 31 (26.3)                     | 6 (13.0)                      | 16 (16.5)                   |
| M0                                                      | 50 (42.4)                     | 22 (47.8)                     | 35 (36.1)                   |
| M1, M1a, M1b, M1c                                       | 37 (31.4)                     | 18 (39.1)                     | 46 (47.4)                   |

Time from initial prostate cancer  
diagnosis to start of the study

|                      |            |            |            |
|----------------------|------------|------------|------------|
| <i>N</i>             | 121        | 47         | 100        |
| Median years (range) | 5.7 (0–29) | 5.4 (1–20) | 4.0 (0–18) |

Presence of bone metastases, n (%)

|          |           |           |           |
|----------|-----------|-----------|-----------|
| <i>N</i> | 92        | 36        | 78        |
| Any      | 79 (85.9) | 31 (86.1) | 70 (89.7) |
| ≥5       | 31 (33.7) | 14 (38.9) | 31 (39.7) |

Visceral metastases, n (%)

|                |         |         |           |
|----------------|---------|---------|-----------|
| <i>N</i>       | 99      | 31      | 87        |
| Liver only     | 3 (3.0) | 1 (3.2) | 9 (10.3)  |
| Lung only      | 9 (9.1) | 1 (3.2) | 11 (12.6) |
| Liver and lung | 2 (2.0) | 0       | 1 (1.1)   |

Biological parameters

PSA, ng/mL

|           |                 |                |                  |
|-----------|-----------------|----------------|------------------|
| <i>N</i>  | 118             | 47             | 99               |
| Mean (SD) | 85.70 (174.249) | 54.80 (69.398) | 174.45 (314.797) |

Lactic acid dehydrogenase, U/L

|           |                |                |                |
|-----------|----------------|----------------|----------------|
| <i>N</i>  | 56             | 15             | 38             |
| Mean (SD) | 336.8 (313.73) | 288.8 (151.54) | 357.1 (343.87) |

Hemoglobin, g/dL

|           |             |             |             |
|-----------|-------------|-------------|-------------|
| <i>N</i>  | 108         | 38          | 92          |
| Mean (SD) | 12.4 (1.62) | 12.9 (1.49) | 12.4 (1.78) |

Alkaline phosphatase, U/L

|           |                |                |                |
|-----------|----------------|----------------|----------------|
| <i>N</i>  | 92             | 39             | 73             |
| Mean (SD) | 193.6 (294.45) | 177.4 (243.16) | 256.7 (302.12) |

Comorbidities requiring treatment, *n*

(%)

|                                       |             |            |             |
|---------------------------------------|-------------|------------|-------------|
| Any                                   | 121 (100.0) | 47 (100.0) | 100 (100.0) |
| Cardiovascular                        | 101 (83.5)  | 36 (76.6)  | 84 (84.0)   |
| Hypertension                          | 84 (69.4)   | 31 (66.0)  | 76 (76.0)   |
| Angina pectoris                       | 7 (5.8)     | 5 (10.6)   | 7 (7.0)     |
| Myocardial infarction                 | 18 (14.8)   | 4 (8.5)    | 11 (11.0)   |
| Arrhythmia                            | 9 (7.4)     | 6 (12.8)   | 12 (12.0)   |
| Thromboembolic disease                | 5 (4.1)     | 0          | 3 (3.0)     |
| Cerebrovascular accident              | 6 (5.0)     | 2 (4.3)    | 5 (5.0)     |
| Transient ischemic attack             | 2 (1.7)     | 0          | 3 (3.0)     |
| Other cardiovascular                  | 29 (24.0)   | 10 (21.3)  | 13 (13.0)   |
| Respiratory                           | 14 (11.6)   | 6 (12.8)   | 11 (11.0)   |
| Chronic obstructive pulmonary disease | 9 (7.4)     | 5 (10.6)   | 9 (9.0)     |
| Other respiratory                     | 5 (4.1)     | 2 (4.3)    | 2 (2.0)     |
| Renal                                 | 10 (8.3)    | 12 (25.5)  | 7 (7.0)     |
| Chronic renal disease                 | 7 (5.8)     | 6 (12.8)   | 4 (4.0)     |
| Other renal                           | 3 (2.5)     | 6 (12.8)   | 3 (3.0)     |
| Hepatic                               | 2 (1.7)     | 0          | 4 (4.0)     |
| Chronic hepatic disease               | 1 (0.8)     | 0          | 2 (2.0)     |
| Other hepatic                         | 1 (0.8)     | 0          | 2 (2.0)     |
| Neurologic                            | 13 (10.7)   | 4 (8.5)    | 12 (12.0)   |
| Peripheral sensory impairment         | 0           | 0          | 1 (1.0)     |
| Memory impairment                     | 1 (0.8)     | 1 (2.1)    | 1 (1.0)     |
| Cognitive disorder                    | 1 (0.8)     | 1 (2.1)    | 0           |
| Other neurologic                      | 5 (4.1)     | 0          | 2 (2.0)     |
| Infections                            | 0           | 1 (2.1)    | 0           |
| Other infection                       | 0           | 1 (2.1)    | 0           |
| Diabetes mellitus                     | 121 (100.0) | 47 (100.0) | 100 (100.0) |



|                      |           |           |           |
|----------------------|-----------|-----------|-----------|
| Type 2               | 87 (71.9) | 36 (76.6) | 82 (82.0) |
| Type 1               | 34 (28.1) | 11 (23.4) | 18 (18.0) |
| Investigations       |           |           |           |
| Hypercholesterolemia | 24 (19.8) | 11 (23.4) | 21 (21.0) |

---

*ECOG* Eastern Cooperative Oncology Group, *M* metastatic status, *N* number of evaluable patients for each specific parameter, *PSA* prostate-specific antigen, *SD* standard deviation

**Table S4B.** Treatment history at study inclusion in patients with diabetes mellitus in the first-line treatment population

| Prior treatment, <i>n</i> (%)                                                | Abiraterone    | Enzalutamide  | Docetaxel      |
|------------------------------------------------------------------------------|----------------|---------------|----------------|
|                                                                              | <i>N</i> = 121 | <i>N</i> = 47 | <i>N</i> = 100 |
| Orchiectomy since initial diagnosis                                          | 7 (5.8)        | 4 (8.5)       | 7 (7.0)        |
| Radical prostatectomy/prostate-specific radiotherapy since initial diagnosis |                |               |                |
| Both radical prostatectomy and prostate-specific radiotherapy                | 10 (8.3)       | 4 (8.5)       | 14 (14.0)      |
| Radical prostatectomy only                                                   | 15 (12.4)      | 4 (8.5)       | 10 (10.0)      |
| Prostate-specific radiotherapy only                                          | 36 (29.8)      | 12 (25.5)     | 23 (23.0)      |
| None                                                                         | 60 (49.6)      | 27 (57.4)     | 53 (53.0)      |
| Prior systemic anticancer therapy                                            |                |               |                |
| Any                                                                          | 115 (95.0)     | 46 (97.9)     | 94 (94.0)      |
| Endocrine therapy                                                            | 112 (92.6)     | 45 (95.7)     | 93 (93.0)      |
| Antiandrogen                                                                 | 96 (79.3)      | 42 (89.4)     | 81 (81.0)      |
| GnRH-agonist                                                                 | 74 (61.2)      | 30 (63.8)     | 73 (73.0)      |
| Steroids                                                                     | 6 (5.0)        | 4 (8.5)       | 14 (14.0)      |
| GnRH antagonist                                                              | 12 (9.9)       | 1 (2.1)       | 5 (5.0)        |
| Estrogens and derivatives                                                    | 2 (1.7)        | 2 (4.3)       | 2 (2.0)        |
| Adrenal synthesis inhibitors                                                 | 2 (1.7)        | 0             | 1 (1.0)        |
| Other                                                                        | 0              | 1 (2.1)       | 0              |
| Bone-targeted                                                                |                |               |                |
| Any                                                                          | 21 (17.4)      | 9 (19.1)      | 24 (24.0)      |
| Zoledronic acid                                                              | 16 (13.2)      | 5 (10.6)      | 18 (18.0)      |
| Denosumab                                                                    | 5 (4.1)        | 3 (6.4)       | 3 (3.0)        |
| Other                                                                        | 1 (0.8)        | 3 (6.4)       | 4 (4.0)        |

Other

3 (2.5)

1 (2.1)

1 (1.0)

---

*GnRH* gonadotropin-releasing hormone

**Table S5A.** Patient demographics and disease and biological characteristics at study inclusion in patients with visceral metastases in the first-line treatment population

| Characteristic                                                           | Abiraterone<br><i>N</i> = 59 | Docetaxel<br><i>N</i> = 88 |
|--------------------------------------------------------------------------|------------------------------|----------------------------|
| <b>Age</b>                                                               |                              |                            |
| Mean (SD) years                                                          | 75.9 (7.54)                  | 69.3 (8.07)                |
| Median (range), years                                                    | 76.0 (49–93)                 | 70.0 (53–83)               |
| <b>Age group, <i>n</i> (%)</b>                                           |                              |                            |
| <65 years                                                                | 2 (3.4)                      | 28 (31.8)                  |
| 65–74 years                                                              | 25 (42.4)                    | 33 (37.5)                  |
| ≥75 years                                                                | 32 (54.2)                    | 27 (30.7)                  |
| <b>ECOG performance status, <i>n</i> (%)</b>                             |                              |                            |
| <i>N</i>                                                                 | 55                           | 87                         |
| 0                                                                        | 23 (41.8)                    | 34 (39.1)                  |
| 1                                                                        | 26 (47.3)                    | 46 (52.9)                  |
| ≥2                                                                       | 6 (10.9)                     | 7 (8.0)                    |
| <b>Gleason score at initial diagnosis, <i>n</i> (%)</b>                  |                              |                            |
| <i>N</i>                                                                 | 52                           | 85                         |
| ≤6                                                                       | 8 (15.4)                     | 7 (8.2)                    |
| 7                                                                        | 15 (28.8)                    | 26 (30.6)                  |
| 8–10                                                                     | 29 (55.8)                    | 52 (61.2)                  |
| <b>M stage at initial diagnosis, <i>n</i> (%)</b>                        |                              |                            |
| <i>N</i>                                                                 | 57                           | 86                         |
| Mx                                                                       | 13 (22.8)                    | 12 (14.0)                  |
| M0                                                                       | 23 (40.4)                    | 31 (36.0)                  |
| M1, M1a, M1b, M1c                                                        | 21 (36.8)                    | 43 (50.0)                  |
| <b>Time from initial prostate cancer diagnosis to start of the study</b> |                              |                            |

|                                          |                  |                  |
|------------------------------------------|------------------|------------------|
| <i>N</i>                                 | 59               | 88               |
| Median years (range)                     | 5.3 (1–29)       | 2.6 (0–22)       |
| Presence of bone metastases, n (%)       |                  |                  |
| <i>N</i>                                 | 37               | 61               |
| Any                                      | 32 (86.5)        | 56 (91.8)        |
| ≥5                                       | 17 (45.9)        | 30 (49.2)        |
| Visceral metastases, n (%)               |                  |                  |
| <i>N</i>                                 | 59               | 88               |
| Liver only                               | 13 (22.0)        | 39 (44.3)        |
| Lung only                                | 39 (66.1)        | 40 (45.5)        |
| Liver and lung                           | 7 (11.9)         | 9 (10.2)         |
| Biological parameters                    |                  |                  |
| PSA, ng/mL                               |                  |                  |
| <i>N</i>                                 | 58               | 83               |
| Mean (SD)                                | 192.25 (663.193) | 187.05 (395.683) |
| Lactic acid dehydrogenase, U/L           |                  |                  |
| <i>N</i>                                 | 25               | 44               |
| Mean (SD)                                | 365.8 (386.82)   | 381.8 (275.10)   |
| Hemoglobin, g/dL                         |                  |                  |
| <i>N</i>                                 | 52               | 73               |
| Mean (SD)                                | 12.1 (2.03)      | 12.5 (1.82)      |
| Alkaline phosphatase, U/L                |                  |                  |
| <i>N</i>                                 | 45               | 58               |
| Mean (SD)                                | 232.9 (422.23)   | 181.1 (137.80)   |
| Comorbidities requiring treatment, n (%) |                  |                  |
| Any                                      | 46 (78.0)        | 57 (64.8)        |
| Cardiovascular                           | 37 (62.7)        | 53 (60.2)        |
| Hypertension                             | 26 (44.1)        | 43 (48.9)        |

|                                       |           |           |
|---------------------------------------|-----------|-----------|
| Angina pectoris                       | 1 (1.7)   | 7 (8.0)   |
| Myocardial infarction                 | 4 (6.8)   | 5 (5.7)   |
| Arrhythmia                            | 7 (11.9)  | 10 (11.4) |
| Thromboembolic disease                | 2 (3.4)   | 7 (8.0)   |
| Cerebrovascular accident              | 1 (1.7)   | 1 (1.1)   |
| Other cardiovascular                  | 15 (25.4) | 12 (13.6) |
| Respiratory                           | 11 (18.6) | 5 (5.7)   |
| Chronic obstructive pulmonary disease | 9 (15.3)  | 2 (2.3)   |
| Other respiratory                     | 2 (3.4)   | 3 (3.4)   |
| Renal                                 | 3 (5.1)   | 7 (8.0)   |
| Chronic renal disease                 | 1 (1.7)   | 3 (3.4)   |
| Other renal                           | 2 (3.4)   | 4 (4.5)   |
| Hepatic                               | 1 (1.7)   | 1 (1.1)   |
| Other hepatic                         | 1 (1.7)   | 1 (1.1)   |
| Neurologic                            | 2 (3.4)   | 3 (3.4)   |
| Peripheral sensory impairment         | 0         | 1 (1.1)   |
| Other neurologic                      | 1 (1.7)   | 1 (1.1)   |
| Infections                            | 1 (1.7)   | 0         |
| Other infection                       | 1 (1.7)   | 0         |
| Diabetes mellitus                     | 14 (23.7) | 21 (23.9) |
| Type 2                                | 9 (15.3)  | 15 (17.0) |
| Type 1                                | 5 (8.5)   | 6 (6.8)   |
| Investigations                        |           |           |
| Hypercholesterolemia                  | 11 (18.6) | 13 (14.8) |

*ECOG* Eastern Cooperative Oncology Group, *M* metastatic status, *N* number of evaluable patients for each specific parameter, *PSA* prostate-specific antigen, *SD* standard deviation

**Table S5B.** Treatment history at study inclusion in patients with visceral metastases in the first-line treatment population

| Prior treatment, n (%)                                                       | Abiraterone<br>N = 59 | Docetaxel<br>N = 88 |
|------------------------------------------------------------------------------|-----------------------|---------------------|
| Orchiectomy since initial diagnosis                                          | 1 (1.7)               | 6 (6.8)             |
| Radical prostatectomy/prostate-specific radiotherapy since initial diagnosis |                       |                     |
| Both radical prostatectomy and prostate-specific radiotherapy                | 8 (13.6)              | 9 (10.2)            |
| Radical prostatectomy only                                                   | 6 (10.2)              | 10 (11.4)           |
| Prostate-specific radiotherapy only                                          | 12 (20.3)             | 19 (21.6)           |
| None                                                                         | 33 (55.9)             | 50 (56.8)           |
| Prior systemic anticancer therapy                                            |                       |                     |
| Any                                                                          | 57 (96.6)             | 82 (93.2)           |
| Endocrine therapy                                                            | 56 (94.9)             | 82 (93.2)           |
| Antiandrogen                                                                 | 50 (84.7)             | 71 (80.7)           |
| GnRH-agonist                                                                 | 31 (52.5)             | 58 (65.9)           |
| Steroids                                                                     | 5 (8.5)               | 8 (9.1)             |
| GnRH antagonist                                                              | 6 (10.2)              | 5 (5.7)             |
| Estrogens and derivatives                                                    | 2 (3.4)               | 2 (2.3)             |
| Adrenal synthesis inhibitors                                                 | 0                     | 2 (2.3)             |
| Bone-targeted                                                                |                       |                     |
| Any                                                                          | 9 (15.3)              | 24 (27.3)           |
| Zoledronic acid                                                              | 6 (10.2)              | 20 (22.7)           |
| Denosumab                                                                    | 2 (3.4)               | 5 (5.7)             |
| Other                                                                        | 2 (3.4)               | 1 (1.1)             |

*GnRH* gonadotropin-releasing hormone
